# Supplementary figures and images for: The Influence of Substituting Prices, Product Returns, and Service Quality on Repurchase Intention
Source: Hindawi journal article supplement (doi:10.1155/2021/4167340), 2021-01-01

### Graphical Representation of Abstract

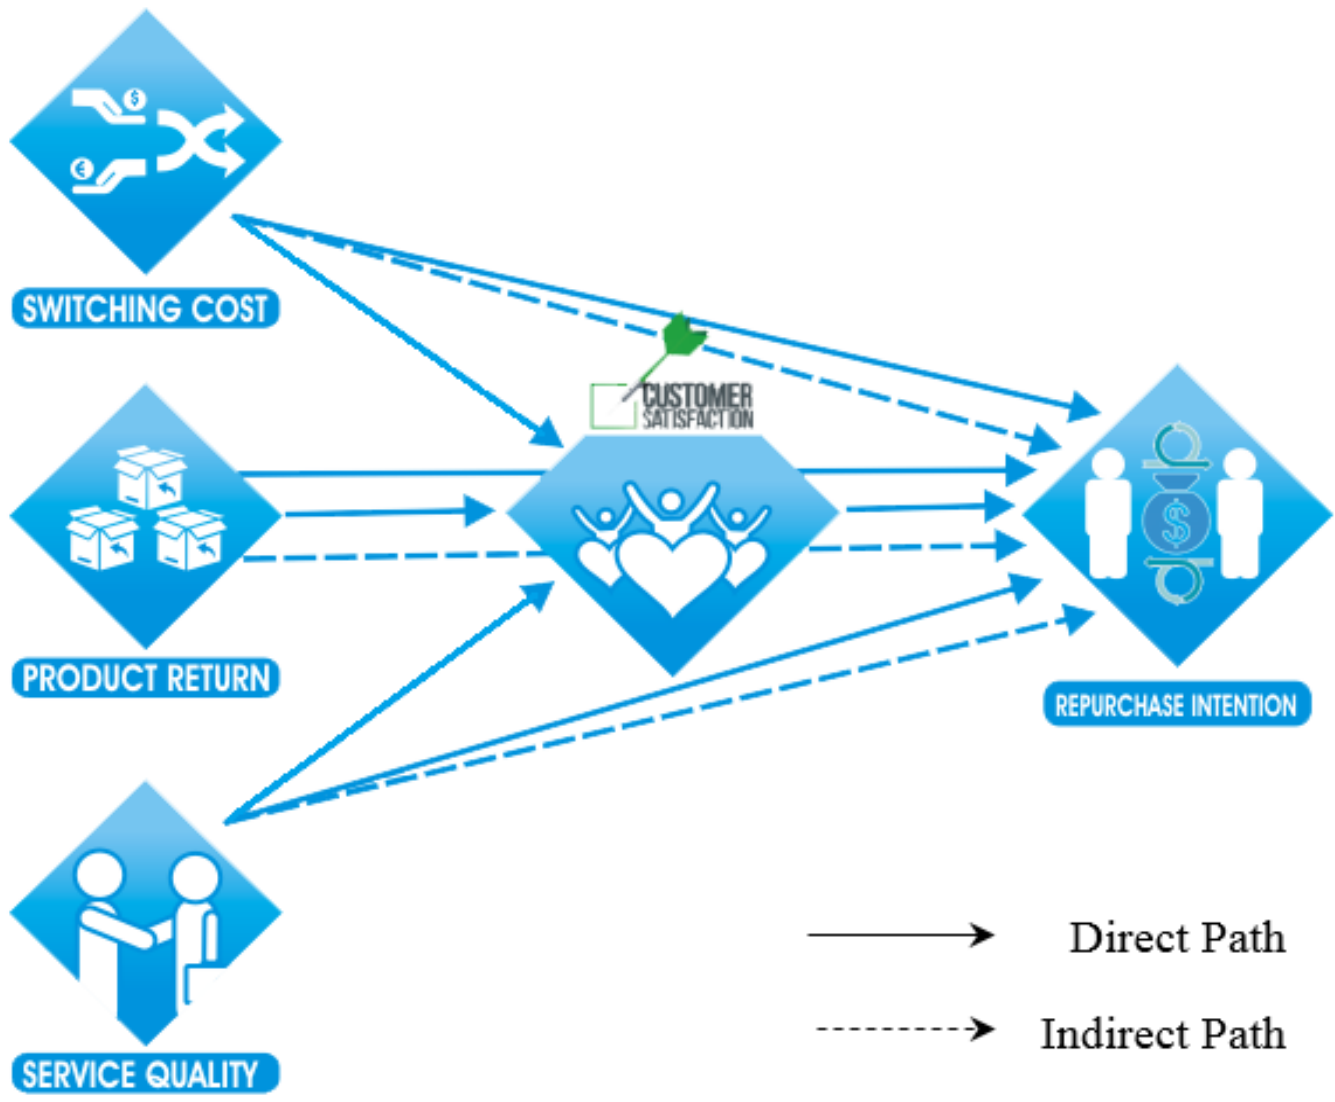

Supplement: f1 [file 4167340.f1.pdf]
